## 25 **Abstract**

26 Filarial nematodes can cause debilitating diseases in humans. They have complicated  
27 life cycles involving an insect vector and mammalian hosts, and they go through a  
28 number of developmental molts. While whole genome sequences of parasitic worms are  
29 now available, very little is known about transcription factor (TF) binding sites and their  
30 cognate transcription factors that play a role in regulating development. To address this  
31 gap, we developed a novel motif prediction pipeline, Emotif Alpha, that integrates ten  
32 different motif discovery algorithms, multiple statistical tests, and a comparative analysis  
33 of conserved elements between the filarial worms *Brugia malayi* and *Onchocerca*  
34 *volvulus*, and the free-living nematode *Caenorhabditis elegans*. We identified stage-  
35 specific TF binding motifs in *B. malayi*, with a particular focus on those potentially  
36 involved in the L3-L4 molt, a stage important for the establishment of infection in the  
37 mammalian host. Using an *in vitro* molting system, we tested and validated three of  
38 these motifs demonstrating the accuracy of the motif prediction pipeline.

39

40

## 41 **Introduction**

42 *Brugia malayi* is a mosquito-borne filarial nematode and one of the causative agents of  
43 lymphatic filariasis, commonly known as elephantiasis. Currently, 856 million people in  
44 52 countries require preventative chemotherapy to stop the spread of the disease  
45 (Gordon et al. 2018). Transmission occurs when the mosquito vector introduces  
46 infective third-stage larvae (L3) during their blood meal. The larvae then migrate to the  
47 lymphatic vessels where they molt twice and develop into adults. Over their lifespan  
48 adult females produce millions of microfilariae (immature larvae) that circulate in the  
49 blood, allowing for continued transmission. Chronic lymphatic filariasis can cause  
50 permanent and disfiguring damage, characterized by lymphoedema (tissue swelling)  
51 and elephantiasis (tissue thickening) of the lower limbs, and hydrocele (scrotal swelling).

52

53 Over the past decade, a few parasitic nematode genomes have been sequenced,  
54 including *B. malayi* (Ghedini et al., 2007), *Loa loa* (Desjardins et al. 2013), and  
55 *Onchocerca volvulus* (Cotton et al. 2016). Transcriptomic experiments have helped  
56 quantify differentially expressed genes and their biological implications (Bennuru et al.,  
57 2016; Choi et al., 2011; Grote et al, 2017; Kariuki, Hearne, & Beerntsen, 2010; Li, Wang,  
58 Rush, Mitreva, & Weil, 2012). However, little is known about how these genes are  
59 regulated through cis-regulatory motifs. Motifs that have been characterized in *B. malayi*  
60 and that are available in the CIS-BP database (Weirauch et al. 2014) are purely  
61 bioinformatic predictions based on transcription factor binding site (TFBS) homology. *De*  
62 *novo* DNA motif discovery is an effective bioinformatic method for studying  
63 transcriptional gene regulation (Dieterich & Sommer, 2008), and a number of motif

64 discovery methods and tools currently exist. These include expectation-maximization  
65 methods, such as MEME (Bailey et al. 2006) and Improbizer (Ao et al. 2004); Gibbs  
66 sampling methods, such as BioProspector (Liu et al. 2001) and MotifSampler (Thijs et al.  
67 2002); k-mer enumeration methods such as Weeder (Pavesi, et al. 2004), DME (Smith  
68 et al. 2005), and DECOD (Huggins et al. 2011); ensemble methods such as W-  
69 ChIPMotifs (Jin et al. 2009), and GimmeMotifs (Heeringen & Veenstra, 2011); and deep  
70 learning methods such as DanQ (Quang & Xie, 2016) and DeepFinder (Lee et al. 2018).  
71 Based on the input types, motif discovery approaches can also be classified as either  
72 generative or discriminative. Generative motif discovery models use pre-defined  
73 background models (e.g., the Hidden Markov Model), while discriminative motif  
74 discovery models need to explicitly specify a set of background sequences. In this study,  
75 we developed Emotif Alpha that integrates a number of the current methods based on  
76 the aforementioned models and filters the motifs using a Z-test, random forest feature  
77 importance, and sequence homology.

78

79 Gene promoter regions play a crucial role in gene regulation yet remain largely  
80 uncharacterized in *B. malayi*. Among the very few promoters that have been previously  
81 described and validated in *B. malayi* is that of Heat Shock Protein 70 (HSP70) (Shu et  
82 al. 2003). A previous study showed that while the regulatory domains of the HSP70  
83 promoter were similar to other eukaryotes, the core promoter domains appeared to be  
84 distinct (Higazi et al., 2005). And nothing is known about motifs regulating  
85 developmentally expressed genes in *B. malayi*. There is thus a need for systematic  
86 identification, annotation, and experimental validation of *B. malayi* promoter motifs

87 associated with gene regulation to better characterize filaria gene expression patterns.  
88 To better understand how promoter elements regulate stage-specific gene expression,  
89 we performed differential gene expression analysis of the L3 to L4 molt, the first  
90 developmental step important for the establishment of infection in the mammalian host,  
91 and motif discovery using the Emotif Alpha pipeline. Several promoter motifs appeared  
92 to be associated with the regulation of the L3 to L4 molt. Our results provide an initial  
93 overview of the putative regulatory mechanisms in the filariae that could be targeted  
94 using novel intervention strategies for control.

95

## 96 **Results**

### 97 **Stage-specific expression of serpins, peptidases, cysteine protease inhibitors,** 98 **and structural constituents of the cuticle during the L3 to L4 molt**

99 Since the L3 to L4 molt is of particular interest because it corresponds to the life cycle  
100 stage when infective larvae establish infection, we focused in this study on identifying  
101 genes that are differentially expressed during this unique process. We used RNA-seq to  
102 profile transcription at different time points during the molt, collecting samples from the  
103 infective L3 (from mosquitoes), L3 Day 6, and L3 Day 9 worms recovered from infected  
104 gerbils (NCBI PRJNA557263). We combined this transcriptome data with previously  
105 published L4 data (Grote et al. 2017) that corresponds to Day 14 post infection of  
106 gerbils (**Table 1**). In total, 2.36 billion reads were generated, with 1.38 billion reads  
107 mapping to the *B. malayi* genome. Each biological replicate received an average of 272  
108 million reads, with an average of 173 million reads that were successfully mapped

109 (Table 1). Of the 11,841 *B. malayi* gene models, 87.6% were expressed in at least one  
110 stage of the L3 to L4 molt (Fig. 1). The molting expression data shows unique stage-  
111 specific profiles for each stage of the molt with significant differential expression  
112 between days.

113

| Library | Total reads (millions) | Stage Total (millions) | Total Mapped Reads (millions) | Stage Total Mapped Reads (millions) | % <i>B. malayi</i> Genes Expressed |
|---------|------------------------|------------------------|-------------------------------|-------------------------------------|------------------------------------|
| L3a     | 294                    | 763                    | 266                           | 639                                 | 84                                 |
| L3b     | 223                    |                        | 204                           |                                     |                                    |
| L3c     | 246                    |                        | 169                           |                                     |                                    |
| L3D6a   | 508                    | 971                    | 131                           | 477                                 | 82.3                               |
| L3D6b   | 243                    |                        | 152                           |                                     |                                    |
| L3D6c   | 220                    |                        | 194                           |                                     |                                    |
| L3D9a   | 300                    | 440                    | 170                           | 266                                 | 81.2                               |
| L3D9b   | 140                    |                        | 96                            |                                     |                                    |
| L4a     | 104                    | 195                    | 47                            | 96                                  | 72.4                               |
| L4b     | 90                     |                        | 49                            |                                     |                                    |

114

115 **Table 1:** RNA-Seq summary. The table shows the total reads sequenced and mapped  
116 in each biological replicate at each developmental stage, L3 to L4; lower case a, b, and  
117 c refer to separate biological replicates.

118

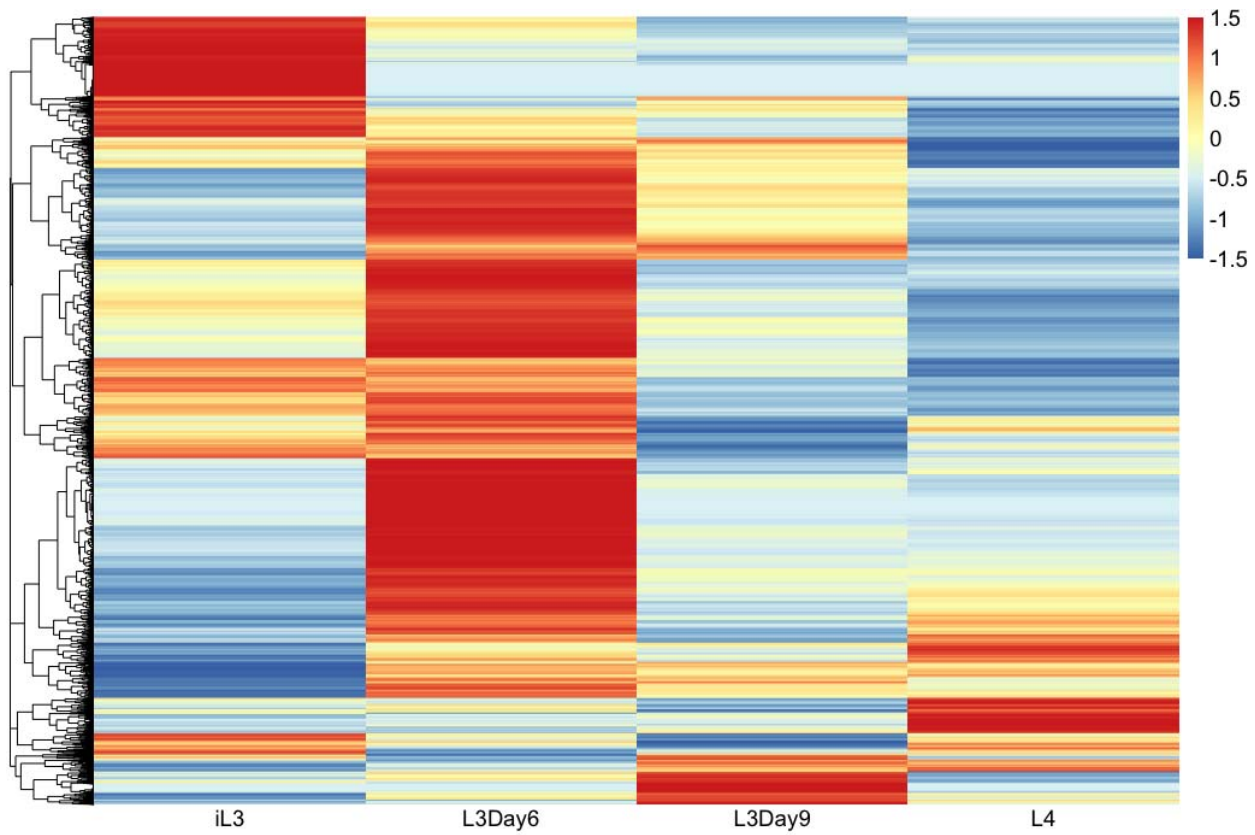

119 **Figure 1: Expression of *Brugia malayi* genes during the L3 to L4 molt.** Expression is in  
120 FPKMs and is Z-scale normalized by row prior to clustering. High expression is indicated by red  
121 and low expression by blue. Time-points included infective L3 larvae (iL3), L3 larvae at Day 6 of  
122 molting (L3D6), L3 larvae at Day 9 of molting (L3D9), and L4 larvae. Biological replicates have  
123 been combined.

124

125 We determined differentially expressed genes during the L3 to L4 molt using both  
126 DESeq (Anders & Huber, 2010) and EdgeR (Robinson et al. 2010) to perform pairwise  
127 comparisons between the four samples. To get a high-confidence list of differentially  
128 expressed genes, we used the consensus of the two algorithms. For the purposes of  
129 this study, we focused on the genes that were up-regulated at each stage of molting, as

130 compared to the other stages, and did a gene-annotation enrichment analysis for each  
131 stage. We found that up-regulated genes in iL3 larvae, as compared to L3D6, L3D9,  
132 and L4, were enriched for annotations involving cysteine-type peptidase activity as well  
133 as serpin domains and serpin family proteins. Cysteine-type peptidases are essential for  
134 molting in *B. malayi* (Guiliano D.B. et al. 2004, Lustigman S. et al. 2004) and serpins are  
135 serine protease inhibitors that have previously been shown to be involved in  
136 immunomodulation and host immune evasion during infection (Zang X, et al. 2001). We  
137 identified five different cysteine-type peptidases and two cysteine-type endopeptidase  
138 inhibitors that were upregulated in iL3 larvae. By day 6 of molting, structural constituents  
139 of the cuticle, including collagen (the main component of the cuticle) were enriched in  
140 the up-regulated gene sets. We also see the up-regulation of several metalloproteases.  
141 At day 9, genes involved in signaling were enriched among the up-regulated genes, as  
142 were several different metalloproteases. At day 14 (L4 larvae), we again see an  
143 enrichment of structural constituents of the cuticle. Similarly to those enriched in L3 day  
144 6 larvae, they are all mostly orthologs of *C. elegans* col (COLlagen) genes, which are  
145 themselves orthologs of human MARCO genes (macrophage receptor with collagenous  
146 structure). The set of structural constituents enriched at day 14 is, however, a  
147 completely unique set of collagen genes as compared to the genes observed at day 6.  
148 These stage-specific enrichments reflect the order of peptidases and structural  
149 constituents necessary for the building of a new L4 cuticle, the separation of the old L3  
150 cuticle from the developing L4 cuticle, and the shedding of the old L3 cuticle.



152 **Identification of 12 motifs associated with transcription factor binding that are**  
153 **enriched in the L3 to L4 molt**

154 To better understand the regulatory program of *B. malayi* during the L3 to L4 molt, we  
155 analyzed statistically over-represented DNA motifs in regions upstream of genes that  
156 were upregulated during molting. To do so, we developed a motif identification pipeline  
157 called Emotif Alpha (**Fig. 2**). First, we used the transcriptome data from the different  
158 stages of the L3 to L4 molt to generate lists of genes up-regulated at each stage of the  
159 molt using pair-wise comparisons. We then did a motif discovery analysis on each gene  
160 set using a combination of three motif discovery tools: GimmeMotifs, DME, and DECOD.  
161 GimmeMotifs is an ensemble of generative motif discovery tools—including Homer  
162 (Heinz et al. 2010), AMD (Shi et al. 2011), BioProspector, MDmodule (Conlon et al.  
163 2003), MEME, Weeder, GADEM (Li et al. 2009), and Improbizer—while DME and  
164 DECOD are discriminative motif discovery tools. We did a discriminative motif discovery  
165 analysis by randomly selecting background promoter region sets from all *B. malayi*  
166 genes, excluding the differentially expressed genes. These background sets are three  
167 times larger than the foreground sets. We selected motif lengths between 6- and 15-mer.  
168 In total, we identified 20,025 motifs.

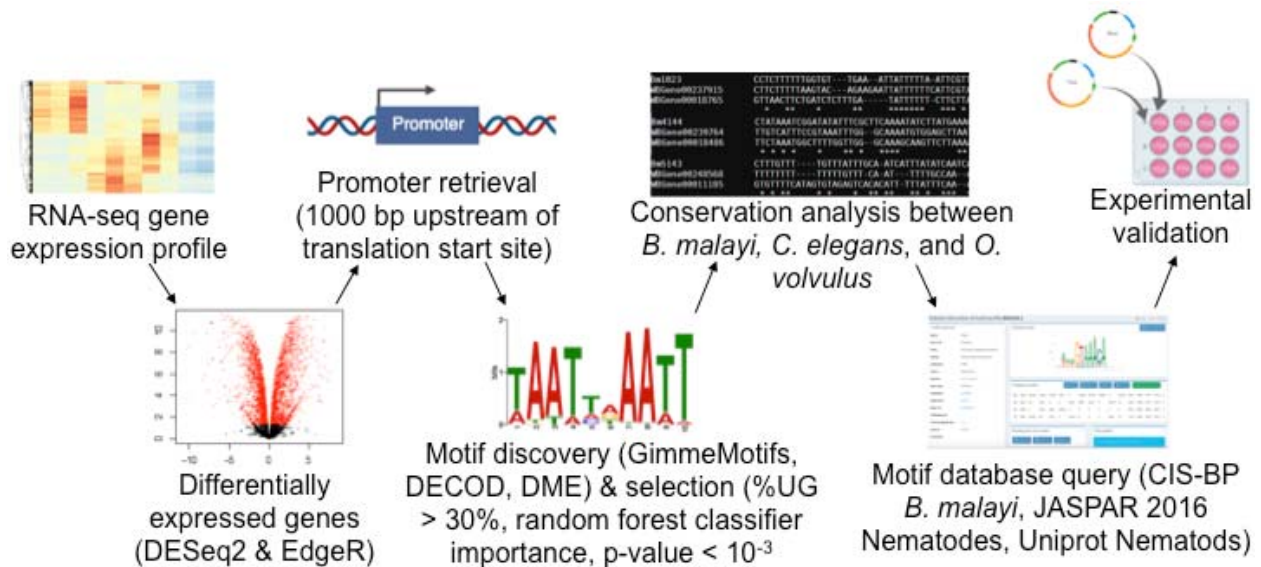

**Figure 2: Workflow of promoter motif identification.** The six main steps for motif

discovery were: 1) generation of an RNA-seq profile, 2) determination of up-regulated genes for every pairwise comparison using DESeq2 (FDR<0.01) and EdgeR (P-value<0.01), 3) promoter retrieval: 1000 bp upstream of the translation start site, 4) ensemble motif discovery using GimmeMotifs (Homer, AMD, BioProspector, MDmodule, MEME, Weeder, GADEM, and Improbizer), DECOD, DME, and selection of enriched motifs: %UG > 30% and random forest classifier feature importance and over-representation p-value < 10<sup>-3</sup>, 5) TFBS conservation analysis between *B. malayi*, *C. elegans*, and *O. volvulus*. 6) motif database query: CIS-BP *B. malayi*, JASPAR 2016 Nematodes, Uniprot Nematodes. Finally, a subset of those identified motifs were experimentally validated.

169

170 To select statistically significant motifs, we first assessed the motifs by a random forest  
171 classifier using scikit-learn (Varoquaux et al. 2015). The random forest algorithm uses  
172 bootstrap sampling and constructs a decision tree for each sub-sample. To evaluate the  
173 motifs, we used both Gini impurity (Gordon et al.1984) and information gain (Quinlan et  
174 al. 1993) criteria and retained the union of the resulting top 40 motifs. We further filtered  
175 the motifs by foreground coverage (i.e. UG%), removing motifs occurring in less than  
176 30% of the genes up-regulated at that stage of molting. We then used a Z-test to

177 compare the frequency of a motif in the up-regulated genes with the expected frequency  
178 in the background promoters. Using a significance level (p-value) cutoff of  $10^{-3}$ , we  
179 selected 395 motifs.

180

181 We retrieved a collection of 163 known nematode transcription factor binding sites  
182 (TFBSs) from the MEME suite (<http://meme-suite.org/>), searching the motif databases  
183 JASPAR CORE 2016 nematodes (Mathelier et al. 2016), CIS-BP *Brugia malayi*  
184 (Weirauch et al. 2014), and Uniprobe worm (Newburger et al. 2009). We matched the  
185 remaining motifs to known TFBSs with TOMTOM (Gupta et al. 2007). If two motifs were  
186 matched to the same binding site and they were discovered from the same gene list, we  
187 considered them to be redundant and kept the one with the lowest over-representation  
188 p-value. This step narrowed our list down to 27 motifs that had matches to known  
189 binding sites.

190

191 We next performed a conservation analysis amongst nematodes using an adaptation of  
192 a published method (Roy et al. 2013). We retrieved orthologous gene information  
193 among *B. malayi*, *C. elegans*, and *O. volvulus* from Wormbase ParaSite Biomart (Howe  
194 et al. 2017). We extracted up to 1Kb upstream from the translation start sites for *B.*  
195 *malayi* genes, assuming these regions would contain the promoter. We performed  
196 multiple sequence alignments using CLUSTALW2 (Larkin et al. 2007), and defined a  
197 motif as conserved if it occurred at the same position in the orthologous promoter region  
198 alignment of either *C. elegans* or *O. volvulus*. This step resulted in 12 remaining motifs  
199 (**Table 2**) that were (1) enriched (p-value <  $10^{-3}$ ) and (2) conserved in either *C. elegans*

200 or *O. volvulus*. The frequency of motif occurrence in the putative promoter regions of  
 201 up-regulated genes ranges from 33% to 94%. The fold enrichment, representing the  
 202 ratio between motif frequencies in the up-regulated gene promoters and background  
 203 promoters, ranges from 1.28 to 2.19.

| Name                | Logo                                                                                | %UG <sup>a</sup> | Ratio <sup>b</sup> | P-value              | Matched known motif               | transcription factor (TF) | Function                                                                                                                   | Gene pair of conserved sites                                                                         |
|---------------------|-------------------------------------------------------------------------------------|------------------|--------------------|----------------------|-----------------------------------|---------------------------|----------------------------------------------------------------------------------------------------------------------------|------------------------------------------------------------------------------------------------------|
| M1.1<br><L4,L3>     |    | 64               | 1.63               | 1.4*10 <sup>-4</sup> | MA0928.1<br>( <i>C. elegans</i> ) | zfh-2                     | Involved in hermaphrodite genitalia development, locomotion, nematode larval development and receptor-mediated endocytosis | [Bm4560, OVOC6906], [Bm856, OVOC3639]                                                                |
| M1.2<br><L3D9,L3>   |    | 84.1             | 1.31               | 7.1*10 <sup>-5</sup> |                                   |                           |                                                                                                                            | [Bm856, OVOC3639], [Bm17348, OVOC8896], [Bm17988, OVOC3292]                                          |
| M1.3<br><L3D6,L3>   |  | 94.4             | 1.28               | 7.6*10 <sup>-6</sup> |                                   |                           |                                                                                                                            | [Bm2559, C34C6.3], [Bm2821, OVOC10446], [Bm17348, OVOC8896], [Bm3341, OVOC10396], [Bm4257, OVOC2553] |
| M1.4<br><L3D9,L3D6> |  | 84.7             | 1.55               | 9.6*10 <sup>-8</sup> |                                   |                           |                                                                                                                            | [Bm7179, OVOC394], [Bm2270, OVOC2391]                                                                |
| M2<br><L3D6,L4>     |  | 93.3             | 1.31               | 2.9*10 <sup>-5</sup> | MA0927.1<br>( <i>C. elegans</i> ) | vab-7                     | Required for DB motorneuron identity and posterior DB axonal polarity                                                      | [Bm4904, OVOC2123]                                                                                   |
| M3.1<br><L3D9,L3D6> |  | 80.6             | 1.33               | 3.0*10 <sup>-4</sup> | MA0542.1<br>( <i>C. elegans</i> ) | elt-3                     | Controlling hypodermal cell differentiation                                                                                | [Bm2802, OVOC9504]                                                                                   |
| M3.2<br><L3D9,L3>   |  | 81.8             | 1.32               | 8.3*10 <sup>-5</sup> |                                   |                           |                                                                                                                            | [Bm10655, C28A5.3, OVOC9600]                                                                         |

|                     |                                                                                     |      |      |                      |                                               |         |                                                                                                                             |                                                                               |
|---------------------|-------------------------------------------------------------------------------------|------|------|----------------------|-----------------------------------------------|---------|-----------------------------------------------------------------------------------------------------------------------------|-------------------------------------------------------------------------------|
| M4.1<br><L4,L3D6>   |    | 34.8 | 2.19 | $4.9 \times 10^{-4}$ | MA0537.1<br>( <i>C. elegans</i> )             | blimp-1 | Loss of blmp-1 activity via deletion mutation has been reported to result in small, dumpy animals with abnormal fat content | [Bm2802, OVOC9504], [Bm6190, OVOC827]                                         |
| M4.2<br><L4,L3>     |    | 56   | 1.71 | $1.6 \times 10^{-4}$ |                                               |         |                                                                                                                             | [Bm7019, OVOC7405], [Bm6190, OVOC827]                                         |
| M4.3<br><L3D9,L3D6> |    | 38.9 | 2.01 | $1.0 \times 10^{-5}$ |                                               |         |                                                                                                                             | [Bm2802, OVOC9504], [Bm7179, OVOC394]                                         |
| M5*<br><L3,L3D6>    |    | 93.3 | 1.23 | $2.9 \times 10^{-4}$ | M5348_1.02<br>(CIS-BP <i>Brugia</i> inferred) | Bm8528  | Retinal homeobox protein Rx3                                                                                                | [Bm1938, OVOC2080], [Bm8228, C27D6.4], [Bm1559, OVOC7210], [Bm4184, OVOC3386] |
| M6*<br><L3,L3D6>    |   | 33.3 | 2.03 | $3.0 \times 10^{-5}$ | M5221_1.02<br>(CIS-BP <i>Brugia</i> inferred) | Bm4429  | Involved in regulation of transcription, DNA-templated and steroid hormone mediated signaling pathway                       | [Bm1938, OVOC2080], [Bm6642, Y48B6A.12]                                       |
| M7*<br><L3,L3D9>    |  | 54.5 | 1.19 | $6.1 \times 10^{-2}$ | M0739_1.02<br>(CIS-BP inferred)               | Bm3608  | Involved in cell growth, proliferation, differentiation, and longevity.                                                     | [Bm4184, OVOC3386]                                                            |

204 **Table 2:** Table of enriched promoter motifs over the L3-L4 molt. Motifs were found to be  
205 enriched ( $p$ -value  $< 10^{-3}$ ) in the upstream elements of up-regulated genes between different  
206 stages of molting and to be conserved (in either *C. elegans* or *O. volvulus*). <sup>a</sup>Frequency of a  
207 motif in up-regulated gene promoters. <sup>b</sup>Relative frequency of a motif in up-regulated gene  
208 promoters vs. background promoters. \*These two motifs have been validated experimentally.  
209 Note that M7 was included in the experimental validation because it passed 4 out of 5 filters,  
210 including foreground coverage filter, random forest filter, known motif filter and conservation  
211 filter. However, it was not included in the 12 reported motifs due to its non-significant  $p$ -value.

212

213 The 12 selected motifs matched known binding sites for 6 transcription factors in *C.*  
214 *elegans* (**Table 2**), all of which are involved in development, aging, and/ or movement.  
215 Motifs M1.1, M1.2, M1.3 and M1.4 matched a zinc-finger protein, zfh-2, which is  
216 involved in hermaphrodite genitalia development, locomotion, nematode larval  
217 development and receptor-mediated endocytosis. Motif M2 matched vab-7, which is  
218 associated with DB motor neuron identity and posterior DB axonal polarity. Motifs M3.1  
219 and M3.2 matched elt-3, which is related to aging (Budovskaya et al. 2008). Motifs  
220 M4.1, M4.2, and M4.3 matched blmp-1. M5 matched a homeobox protein, Bm8528, and  
221 M6 matched a nuclear receptor Bm4429. The 12 motifs are conserved in either *C.*  
222 *elegans* or *O. volvulus* (**Table 2**, last column). Moreover, the occurrence of M3.2 in the  
223 Bm10655 promoter region is conserved in orthologs in both *C. elegans* (promoter of  
224 C28A5.3) and *O. volvulus* (promoter of OVOC9600).

225

226 The motif analysis reveals how some of the differential expression of different proteases  
227 may be orchestrated during the L3 to L4 molt. Motif M1.4 is found in the promoter region  
228 of Bm2270 a metalloprotease significantly up-regulated in L3D9 worms. Bm2270 is an  
229 ortholog of nas-37 in *C. elegans* and has been shown to be involved in collagen and  
230 cuticulin-based cuticle development and ecdysis. Motif M5 is found in the promoter  
231 region of Bm1938 and is predicted to encode a serpin. Bm1938 is one of the serpins  
232 that was found to be significantly up-regulated in the iL3 larvae.

233

234 **L3 stage-specific transcription factor binding motifs can be validated *in vitro***

235 Three of the motifs (M5, M6, and M7) were chosen for validation based on their  
236 enrichment in the promoters of genes up-regulated in the mid to late stages of the L3 to  
237 L4 molt. Three separate genes, each containing one chosen motif, were tested. The 1  
238 kbp upstream region of each gene was amplified from *B. malayi* genomic DNA and  
239 cloned upstream of the firefly luciferase reporter gene in the expression vector pGL3  
240 Basic (Shu et al. 2003). *B. malayi* L3 were then transfected with the constructs in a co-  
241 culture system as previously described (Liu et al. 2018). The parasites were induced to  
242 molt *in vitro* and then assayed for luciferase activity. The number of relative light units  
243 (RLUs) observed were normalized to those obtained from parasites transfected in  
244 parallel with a construct consisting of the *B. malayi* HSP70 promoter driving the  
245 expression of the firefly luciferase reporter (Shu et al. 2018). The experiment was  
246 performed with both the native promoter and a mutant promoter where the nucleotides  
247 of the motif had been randomly shuffled. All of the native promoters produced significant  
248 amounts of reporter luciferase activity in the molting parasites (ranging from 40%- 70%  
249 of the activity produced by the HSP70 construct transfected positive controls; **Fig. 3**).  
250 However, when the putative motifs were mutated, the activity in all the promoters tested  
251 decreased by 80-90% (**Fig. 3**).

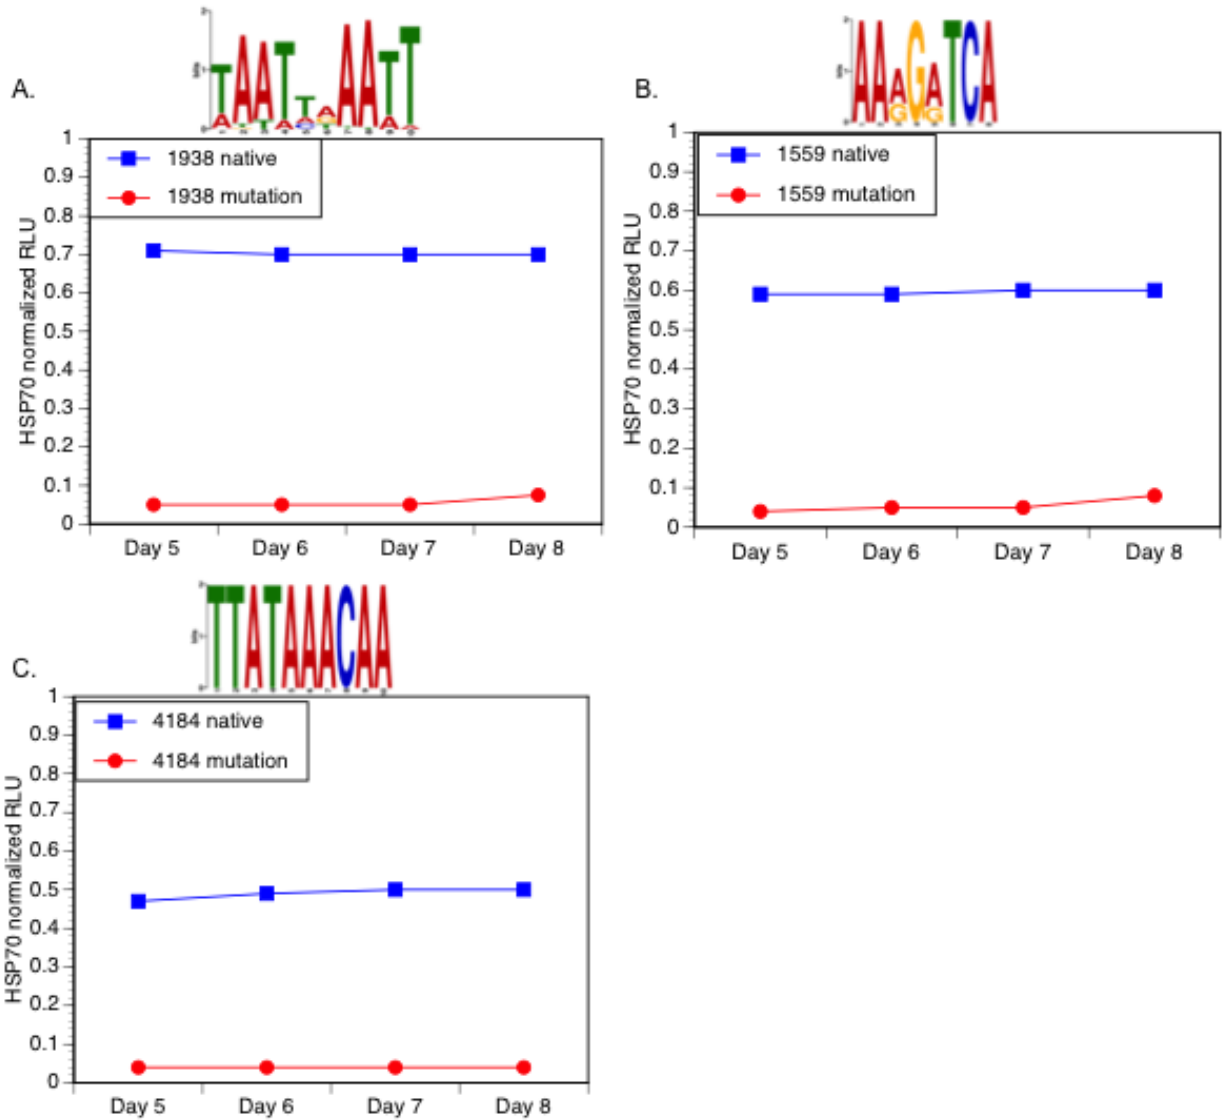

252 **Figure 3: Promoter motif validation.** A) Promoter motif validation in L3 worms that were  
253 molting in vitro using the native promoter of Bm1559 and a mutated motif M5 version of the  
254 same promoter. B) Promoter motif validation using the native promoter of Bm1938 and a  
255 mutated motif M6 version of the promoter. C) Promoter motif validation using the native  
256 promoter of Bm4184 with a mutated motif M7 version of the promoter. In each panel luciferase  
257 activity obtained from the constructs is normalized against parasites transfected with a construct  
258 containing the Bm HSP70 promoter driving the expression of the firefly luciferase reporter.



## 260 **Discussion**

261 Parasitic nematodes such as *B. malayi* maintain a complicated lifecycle involving both  
262 an insect and a mammalian host, and undergo a number of molts. The L3 to L4 molt  
263 that occurs immediately upon infection of the mammalian host is of particular interest as  
264 it marks the establishment of infection and thus represents an attractive point for drug  
265 intervention. Little is known, however, about how *B. malayi* regulates the transitions  
266 between these stages. Prior to our study, nothing was known about promoter motifs that  
267 regulate developmentally expressed genes in *B. malayi*. Because stage transitions rely  
268 on precise transcriptional control through the interaction of transcription factors and their  
269 binding sites, we set out to characterize the potential transcription factor binding motifs  
270 of these parasites and to identify motifs that contribute to stage-specific expression of  
271 genes involved in early worm development in the mammalian host.

272

273 We found a number of enriched motifs and were able to define both conserved motifs  
274 across molting as well as stage-specific motifs. While some of the motifs we identified  
275 are conserved in other nematodes, such as *C. elegans*, a number of motifs represent  
276 novel binding sites potentially reflecting the differences in development and the parasitic  
277 lifestyle. It is known that molting is regulated by an ecdysone-like response system  
278 (Barker et al. 1991; Mhashilkar et al. 2016; Mhashilkar et al. 2016; Warbrick et al. 1993,  
279 Lui et al, 2012). Two of the identified motifs and their cognate TFs appear to be related  
280 to the ecdysone response. For example, *zfh-2*, the transcription factor predicted to bind  
281 four of our identified motifs, is a common cofactor implicated in ecdysone signaling in *D.*  
282 *melanogaster* (Davis et al. 2011). *Blimp-1*, the transcription factor predicted to bind

283 three of our identified motifs, is an ecdysone-inducible repressor that is essential for the  
284 prepupal development in *Drosophila* (Akagi and Ueda 2011). Validation results suggest  
285 that our pipeline is able to identify biologically-relevant motifs involved in molting. This  
286 analysis provided biological insight into the development of the parasite as well as the  
287 identification of novel drug targets.

288

289 Future work needs to be done to expand this analysis across the lifecycle of the  
290 nematode at different stages of development, in its different hosts (i.e. human vs.  
291 mosquito). While transcriptomic data from these stages exists and can be used to  
292 predict motifs, validation at other stages *in vivo* will prove more difficult. However, with  
293 recent innovation in filarial transgenics, it is now possible to create stable transgenic  
294 parasite lines that will allow functional testing *in vivo* of defined promoter motifs at all life  
295 stages of the parasite (Liu et al. 2018).

296

## 297 **Materials and Methods**

### 298 **Transcriptomic study design**

299 All parasites were obtained from FR3 (Filariasis Research Reagent Resource Center;  
300 BEI Resources, Manassas, VA, USA), where they were isolated from infected gerbils  
301 (*Meriones unguiculatus*) or mosquitoes (*Aedes aegypti*). Worms were flash-frozen and  
302 shipped to the New York Blood Center for processing. For transcriptomic sequencing,  
303 infective third-stage larvae (iL3) were recovered from mosquitoes and mammalian stage  
304 larvae were recovered from gerbils at 6 and 9 days post infection (dpi). At 6 dpi, larvae

305 are typically undergoing the molt from L3 to L4, while by 9 dpi the molt is complete  
306 (Mutafchiev et al. 2014). Data was combined with previously published stages 14 dpi  
307 (L4) (Grote et al. 2017).

308

### 309 **RNA isolation, library preparation and sequencing**

310 Total RNA was prepared from *B. malayi* worms as previously described (Grote et al.  
311 2017). RNA was prepared from 3 biological replicates of infective L3 (iL3; 2000 larvae  
312 each), 3 replicates of 6 dpi larvae (1500 each) and 2 replicates of 9 dpi larvae (1300  
313 each). *B. malayi* worms were homogenized in Trizol (ThermoFisher) using a hand-held  
314 pestle in 1.5mL tubes containing the worms. Total RNA was extracted by organic  
315 extraction using Trizol and the PureLink RNA mini kit (ThermoFisher) and after being  
316 treated with DNaseI (New England Biolabs). Ribosomal RNA (rRNA) depletion was  
317 performed using Terminator (Epicentre), a 5'-phosphate-dependent exonuclease that  
318 degrades transcripts with a 5' monophosphate. Libraries were prepared using the  
319 NEBNext Ultra II RNA Library Prep Kit for Illumina (New England Biolabs) according to  
320 manufacturer instructions. Library quality was assessed using a D1000 ScreenTape  
321 Assay (Agilent) prior to sequencing. Library concentrations were assessed using the  
322 qPCR library quantification protocol (KAPA biosystems). Libraries were sequenced on  
323 the Illumina NextSeq500 platform with 150bp paired-end reads. To minimize the  
324 confounding effects of lane-to-lane variation, libraries were multiplexed and sequenced  
325 with technical replicates on multiple lanes. Each biological replicate received an  
326 average of 135 million mapped reads (PRJNA557263).

327

## 328 **Sequencing alignment and expression analysis**

329 Read quality was assessed using FastQC (Babraham Bioinformatics). Sequence reads  
330 from each sample were analyzed with the Tuxedo suite of tools (Kim et al. 2013;  
331 Trapnell et al. 2013; Trapnell et al. 2010). Reads were mapped with Tophat2's Bowtie2-  
332 very-sensitive algorithm to the annotated *B. malayi* genome assembly (WormBase.org).  
333 The resulting BAM files were then used with HtSeq to obtain raw read counts.  
334 Differential gene expression analysis was performed using both DESeq and EdgeR,  
335 and the overlapping genes (FDR < 0.01 & P-value < 0.01) were retained. Up-regulated  
336 genes were characterized for each pairwise comparison between L3, L3 Day 6 (L3D6),  
337 L3 day 9 (L3D9), and L4 worms. For example, <L3,L4> refers to the up-regulated genes  
338 in L3 compared to L4. Two pairs of comparisons, <L3D9,L4> and <L4,L3D9>, were  
339 dropped due to the limited number of up-regulated genes ( $\leq 3$ ), possible due to the  
340 L3D9 being actually younger L4. The up-regulated gene lists were filtered using log2  
341 fold change (logFC) with the following thresholds:  $|\logFC| = 7$  for <L3D6,L3>,  
342 <L3D6,L3D9>, <L3D6,L4>;  $|\logFC| = 4$  for <L3D9,L3>, <L3,L3D6>, <L3,L3D9>,  
343 <L3,L4>, <L4,L3>;  $|\logFC| = 2.5$  for <L3D9,L3D6>, <L4,L3D6>. The reason for varying  
344 the threshold was that the number of up-regulated genes in each list varied significantly;  
345 for motif discovery tools to search efficiently, the number of sequences were limited to  
346 less than one hundred. In total, 10 up-regulated gene lists were used for motif discovery  
347 **(Table S1).**

348

349 Potential promoter sequences were retrieved from WormBase ParaSite Biomart (Howe  
350 et al. 2016) web interface, capturing the 1000bp upstream of the translation start site for  
351 each gene.

352

### 353 **The Emotif Alpha pipeline for regulatory motif identification**

354 The Emotif Alpha pipeline (freely available at: [https://github.com/YichaoOU/Emotif\\_Alpha](https://github.com/YichaoOU/Emotif_Alpha))  
355 was developed to automate motif discovery analysis for the 10 up-regulated gene lists.  
356 This pipeline was written in python and was applied to perform all aforementioned motif  
357 analyses. The motif discovery step used multiple tools and was run in parallel at the  
358 Ohio SuperComputer Center. Motif length search was from 6 to 14. Motif scanning was  
359 done using FIMO (Grant et al. 2011) with a default p-value threshold of  $10^{-4}$ . We  
360 implemented 5 different motif filters. (1) Foreground coverage (i.e., UG%) was defined  
361 as the proportion of up-regulated gene promoters containing the given motif. We set a  
362 minimal foreground coverage at 30%. (2) Motifs were then filtered by a random forest  
363 classifier. The union of the top 40 motifs that resulted from either Gini impurity or  
364 information gain criterion was retained. (3) Motif enrichment p-value was calculated  
365 using Z-test and the cutoff was  $10^{-3}$ . (4) Known motif filter was performed using  
366 TOMTOM and a collection of 163 known nematode TFBSs. The motif similarity p-value  
367 threshold was  $10^{-4}$ . (5) Conservation analysis was performed using a method described  
368 in (Roy et al. 2013). Only conserved motifs were kept.

369

### 370 ***In vitro* validation of promoter transcription motifs**

371 The putative TF motifs M5, M6, and M7 were chosen for validation based on their  
372 enrichment in the promoters of genes upregulated in the mid to late stages of the L3 to  
373 L4 molt. Three different genes, each containing one of the chosen motifs, were used for  
374 the validation assay. As previously described in Shu et al. (Shu et al. 2003), we  
375 amplified the 1 kbp region upstream of each gene from *B. malayi* genomic DNA and  
376 cloned upstream of the firefly luciferase reporter gene in the expression vector pGL3  
377 Basic. We then transfected *B. malayi* L3 larvae with the constructs in a co-culture  
378 system as previously described (Liu et al. 2018). The parasites were induced to molt by  
379 the addition of ascorbic acid on day 5, and parasites were assayed for luciferase activity  
380 on days 5-8, as by day 9 the molting was complete. We normalized the number of RLUs  
381 observed to those obtained from parasites transfected in parallel with a construct  
382 consisting of the *B. malayi* HSP70 promoter driving the expression of the firefly  
383 luciferase reporter (Shu et al. 2018) to control for accumulation of the firefly luciferase  
384 over time during the duration of the experiment. We did the experiment with both  
385 the native promoter and a mutant promoter where the nucleotides of the motif had  
386 been randomly shuffled (**Table S2**).

387

## 388 **Funding**

389 This work was supported by grant US National Institute of Allergy and  
390 Infectious Diseases (NIAID) grant number R21 AI135172-01A1 to TRU, R56 AI101372  
391 to EG, TRU, and SL, and R21 AI126466 to EG. LW received funding from the *The Ohio*  
392 *University GERB Program*. AG received funding from the T32 Ruth L. Kirschstein

393 Institutional National Research Service Award (T32AI007180) and the F31 Ruth L.

394 Kirschstein Pre-doctoral Individual NRSA (F31AI131527).

395

396

397

## References

- 398 Akagi, K., Ueda, H. (2011). Regulatory Mechanisms of Ecdysone-Inducible Blimp-1  
399 Encoding a Transcriptional Repressor that is Important for the Prepupal  
400 Development in *Drosophila*. *Development, Growth & Differentiation*, 53 (5): 697–  
401 703.
- 402 Anders, S., & Huber, W. (2010). Differential Expression Analysis for Sequence Count  
403 Data. *Genome Biology*, 11(R106).
- 404 Ao, W., Gaudet, J., Kent, W. J., Muttumu, S., & Mango, S. E. (2004). Environmentally  
405 Induced Foregut Remodeling by PHA-4/FoxA and DAF-12/NHR. *Science*,  
406 305(5691), 1743–1746. <https://doi.org/10.1126/science.1102216>
- 407 Bailey, T. L., Williams, N., Misleh, C., & Li, W. W. (2006). MEME: Discovering and  
408 Analyzing DNA and Protein Sequence Motifs. *Nucleic Acids Research*, 34(suppl\_2),  
409 W369–W373. <https://doi.org/10.1093/nar/gkl198>
- 410 Barker, G. C., J. G. Mercer, H. H. Rees, & R. E. Howells. (1991). The Effect of  
411 Ecdysteroids on the Microfilarial Production of *Brugia pahangi* and the Control of  
412 Meiotic Reinitiation in the Oocytes of *Dirofilaria immitis*. *Parasitology Research*, 77  
413 (1): 65–71
- 414 Bennuru, S., Cotton, J.A., Ribeiro, J.M., Grote, A., Harsha, B., Holroyd, N., Mhashilkar,  
415 A., Molina, D.M., Randall, A.Z., Shandling, A.D., Unnasch, T.R., Ghedin, E.,  
416 Berriman, M., Lustigman, S., Nutman, T.B. (2016). Stage-Specific Transcriptome  
417 and Proteome Analyses of the Filarial Parasite *Onchocerca volvulus* and Its  
418 *Wolbachia* Endosymbiont. *mBio*, 7(6). PMC5137501.



- 419 Breiman, L., Friedman, J., Stone, C., Olshen, R.A. Classification and Regression Trees.  
420 Taylor & Francis, Jan 1, 1984.
- 421 Budovskaya, Y.V., Wu, K., Southworth, L., Jiang, M., Tedesco, P., Johnson, T., & Kim,  
422 S. (2008). An Elt-3/elt-5/elt-6 GATA Transcription Circuit Guides Aging in *C.*  
423 *Elegans*. *Cell*, 134 (2): 291–303.
- 424 Choi, Y.-J., Ghedin, E., Berriman, M., McQuillan, J., Holroyd, N., Mayhew, G. F., ...  
425 Michalski, M. L. (2011). A Deep Sequencing Approach to Comparatively Analyze  
426 the Transcriptome of Lifecycle Stages of the Filarial Worm, *Brugia malayi*. *PLOS*  
427 *Neglected Tropical Diseases*, 5(12), 1–10.  
428 <https://doi.org/10.1371/journal.pntd.0001409>
- 429 Conlon, E.M., Liu, X.S., Lieb, J., & Liu, J. (2003). Integrating Regulatory Motif Discovery  
430 and Genome-Wide Expression Analysis. *Proceedings of the National Academy of*  
431 *Sciences of the United States of America*, 100 (6): 3339–44.
- 432 Cotton, J. A., Bennuru, S., Grote, A., Harsha, B., Tracey, A., Beech, R., Doyle, S., et al.  
433 (2016). The Genome of *Onchocerca volvulus*, Agent of River Blindness. *Nature*  
434 *Microbiology*, 2 (2). <https://doi.org/10.1038/nmicrobiol.2016.216>.
- 435 Das, M. K., & Dai, H.-K. (2007). A Survey of DNA Motif Finding Algorithms. *BMC*  
436 *Bioinformatics*, 8(7), S21. <https://doi.org/10.1186/1471-2105-8-S7-S21>
- 437 Davis, M.B., SanGil, I., Berry, G., Olayokun, R., & Neves, L. (2011). Identification of  
438 Common and Cell Type Specific LXXLL Motif EcR Cofactors Using a Bioinformatics  
439 Refined Candidate RNAi Screen in *Drosophila Melanogaster* Cell Lines. *BMC*  
440 *Developmental Biology*, 11 (November): 66.

- 441 Desjardins, C. A., et al. (2013). Genomics of *Loa loa*, a Wolbachia-free Filarial Parasite  
442 of Humans. *Nature Genetics*, 45(5): 495-500.
- 443 Dieterich, C., & Sommer, R.J. (2008). A Caenorhabditis Motif Compendium for Studying  
444 Transcriptional Gene Regulation. *BMC Genomics*, 9(1), 30.  
445 <https://doi.org/10.1186/1471-2164-9-30>
- 446 Foster, J., Ganatra, M., Kamal, I., Ware, J., Makarova, K., Ivanova, N., Bhattacharyya,  
447 A., et al. (2005). The Wolbachia Genome of *Brugia Malayi*: Endosymbiont Evolution  
448 within a Human Pathogenic Nematode. *PLoS Biology*. 3 (4): e121.
- 449 Ghedin, E., Wang, S., Spiro, D., Caler, E., Zhao, Q., Crabtree, J., ... Scott, A. L. (2007).  
450 Draft Genome of the Filarial Nematode Parasite *Brugia malayi*. *Science*, 317(5845),  
451 1756–1760. <https://doi.org/10.1126/science.1145406>
- 452 Gordon, A. D., Breiman, L., Friedman, J.H., Olshen, R.A., & Stone, C.J. (1984).  
453 Classification and Regression Trees. *Biometrics*. <https://doi.org/10.2307/2530946>.
- 454 Gordon, C.A., Jones, M.K., McManus, D.P. (2018) The history of Bancroftian Lymphatic  
455 Filariasis in Australasia and Oceania: Is there a Threat of Re-occurrence in Mainland  
456 Australia? *Tropical Medicine and Infectious Disease*, 3(2), 58.
- 457 Grant C.E., Bailey T.L., Noble W.S. (2011). FIMO: Scanning for Occurrences of a Given  
458 Motif. *Bioinformatics*, 27(7):1017–1018. doi:10.1093/bioinformatics/btr064
- 459 Grote, A., Lustigman, S., Ghedin, E. (2017) Lessons from the genomes and  
460 transcriptomes of filarial nematodes. *Molecular and Biochemical Parasitology*,  
461 215:23-29. doi: 10.1016/j.molbiopara.2017.01.004.

- 462 Grote, A., Voronin, D., Ding, T., Twaddle, A., Unnasch, T., Lustigman, S., & Ghedin, E.  
463 (2017). Defining *Brugia Malayi* and *Wolbachia* Symbiosis by Stage-Specific Dual  
464 RNA-Seq. *PLoS Neglected Tropical Diseases*, 11 (3): e0005357.
- 465 Guiliano, D.B., Hong, X., McKerrow, J.H., Blaxter, M.L., Oksov, Y., Liu, J., Ghedin, E.,  
466 Lustigman, S. (2004). A Gene Family of Cathepsin L-like Proteases of Filarial  
467 Nematodes are Associated with Larval Molting and Cuticle and Eggshell  
468 Remodeling. *Mol Biochem Parasitol*, 136: 227-42.
- 469 Gupta, S., Stamatoyannopoulos, J.A., Bailey, T.L., & Noble, W. (2007). Quantifying  
470 Similarity between Motifs. *Genome Biology*, 8 (2): R24.
- 471 Heeringen, S. J. Van, & Veenstra, G. J. C. (2011). GimmeMotifs: a De Novo Motif  
472 Prediction Pipeline for ChIP-sequencing Experiments. *Bioinformatics*, 27(2), 270–  
473 271. <https://doi.org/10.1093/bioinformatics/btq636>
- 474 Heinz, S., Benner, C., Spann, N., Bertolino, E., Lin, Y., Laslo, P., Cheng, J., Murre, C.,  
475 Singh, H., & Glass, C. (2010). Simple Combinations of Lineage-Determining  
476 Transcription Factors Prime Cis-Regulatory Elements Required for Macrophage  
477 and B Cell Identities. *Molecular Cell*. <https://doi.org/10.1016/j.molcel.2010.05.004>.
- 478 Higazi, T. B., DeOliveira, A., Katholi, C. R., Shu, L., Barchue, J., Lisanby, M., &  
479 Unnasch, T. R. (2005). Identification of Elements Essential for Transcription in  
480 *Brugia malayi* Promoters. *Journal of Molecular Biology*, 353(1), 1–13.  
481 <https://doi.org/https://doi.org/10.1016/j.jmb.2005.08.014>
- 482 Howe, K. L., Bolt, B. J., Shafie, M., Kersey, P., & Berriman, M. (2017). WormBase  
483 ParaSite – a Comprehensive Resource for Helminth Genomics. *Molecular and*

- 484 *Biochemical Parasitology*.
- 485 <https://doi.org/https://doi.org/10.1016/j.molbiopara.2016.11.005>
- 486 Huggins, P., Zhong, S., Shiff, I., Beckerman, R., Laptenko, O., Prives, C., ... Bar-  
487 Joseph, Z. (2011). DECOD: Fast and Accurate Discriminative DNA Motif Finding.  
488 *Bioinformatics*, 27(17), 2361–2367. <https://doi.org/10.1093/bioinformatics/btr412>
- 489 Jin, V. X., Apostolos, J., Nagisetty, N. S. V. R., & Farnham, P. J. (2009). W-ChIPMotifs:  
490 a Web Application Tool for De Novo Motif Discovery from ChIP-Based High-  
491 Throughput Data. *Bioinformatics*, 25(23), 3191–3193.
- 492 Kariuki, M. M., Hearne, L. B., & Beerntsen, B. T. (2010). Differential Transcript  
493 Expression between the Microfilariae of the Filarail Nematodes, *Brugia malayi* and  
494 *B. pahangi*. *BMC Genomics* 11(1), 225. <https://doi.org/10.1186/1471-2164-11-225>
- 495 Kim, D., Pertea, D., Trapnell, C., Pimentel, H., Kelley, R., & Salzberg, S. (2013).  
496 TopHat2: Accurate Alignment of Transcriptomes in the Presence of Insertions,  
497 Deletions and Gene Fusions. *Genome Biology*, 14 (4): R36.
- 498 Larkin, M. A., Blackshields, G., Brown, N. P., Chenna, R., McGettigan, P. A., McWilliam,  
499 H., Valentin, F., et al. (2007). Clustal W and Clustal X Version 2.0.  
500 *Bioinformatics*, 23 (21): 2947–48.
- 501 Lee, N. K., Azizan, F. L., Wong, Y. S., & Omar, N. (2018). DeepFinder: An Integration of  
502 Feature-Based and Deep Learning Approach for DNA Motif Discovery.  
503 *Biotechnology & Biotechnological Equipment*, 1–10.
- 504 Li, B.-W., Wang, Z., Rush, A. C., Mitreva, M., & Weil, G. J. (2012). Transcription  
505 Profiling Reveals Stage- and Function-Dependent Expression Patterns in the

- 506 Filarial Nematode *Brugia malayi*. *BMC Genomics*, 13(1), 184.  
507 <https://doi.org/10.1186/1471-2164-13-184>
- 508 Li, Leping. (2009). GADEM: A Genetic Algorithm Guided Formation of Spaced Dyads  
509 Coupled with an EM Algorithm for Motif Discovery. *Journal of Computational*  
510 *Biology: A Journal of Computational Molecular Cell Biology*, 16 (2): 317–29.
- 511 Liu, X., Brutlag, D. L., & Liu, J. S. (2001). BioProspector: Discovering Conserved DNA  
512 Motifs in Upstream Regulatory Regions of Co-expressed Genes. *Pacific*  
513 *Symposium on Biocomputing*, 127–138.
- 514 Liu C, Enright T, Tzertzinis G, Unnasch TR. (2012) Identification of Genes Containing  
515 Ecdysone Response Elements in the Genome of *Brugia malayi*. *Mol Biochem Parasitol*,  
516 186:38-43; PMID: PMC 3501679.
- 517 Liu C., Mhashilkar, A.S., Chabanon, J., Xu, S., Lustigman, S., Adams, J.H., et al. (2018)  
518 Development of a Toolkit for *piggyBac*-Mediated Integrative Transfection of the  
519 Human Filarial Parasite *Brugia malayi*. *PLoS Negl Trop Dis*, 12(5): e0006509.  
520 <https://doi.org/10.1371/journal.pntd.0006509>
- 521 Lustigman S, Zhang J, Liu J, Oksov Y, Hashmi S. (2004). RNA Interference Targeting  
522 Cathepsin L and Z-like Cysteine Proteases of *Onchocerca volvulus* Confirmed their  
523 Essential Function during L3 Molting. *Mol Biochem Parasitol*, 138: 165-70.
- 524 Mathelier, A., Fornes, O., Arenillas, D., Chen, C., Denay, G., Lee, J., Shi, W., et al.  
525 (2016). JASPAR 2016: A Major Expansion and Update of the Open-Access  
526 Database of Transcription Factor Binding Profiles. *Nucleic Acids Research*, 44 (D1):  
527 D110–15.

- 528 Mhashilkar, A.S., Adapa, S.R., Jiang, R.H., Williams, S.A., Zaky, W., Slatko, B.E., Luck,  
529 A.N., Moorhead, A.R., Unnasch, T.R. (2016) Phenotypic and Molecular Analysis of  
530 the Effect of 20-Hydroxyecdysone on the Human Filarial Parasite *Brugia malayi*. *Int*  
531 *J Parasitol.*, 46(5-6):333-41. doi: 10.1016/j.ijpara.2016.01.005.
- 532 Mhashilkar, A.S., Vankayala, S.L., Lui, C., Kearns, F., Mehrotra, P., Tzertzinis, G., Palli,  
533 S.R., Woodcock, H.L., Unnasch, T.R. (2016) Identification of Ecdysone Hormone  
534 Receptor Agonists as a Therapeutic Approach for Treating Filarial Infections. *PLoS*  
535 *Neglected Tropical Disease*, 10(6):e0004772. doi: 10.1371/journal.pntd.0004772.
- 536 Mutafchiev, Y., Bain, O., Williams, Z., McCall, J.W., & Michalski, M.L. (2014).  
537 Intraperitoneal Development of the Filarial Nematode *Brugia Malayi* in the  
538 Mongolian Jird (*Meriones Unguiculatus*). *Parasitology Research*, 113 (5): 1827–35.
- 539 Newburger, D. E., & Bulyk, M. L. (2009). UniPROBE: An Online Database of Protein  
540 Binding Microarray Data on Protein-DNA Interactions. *Nucleic Acids Research*.  
541 <https://doi.org/10.1093/nar/gkn660>.
- 542 Pavesi, G., Mereghetti, P., Mauri, G., & Pesole, G. (2004). Weeder Web: Discovery of  
543 Transcription Tactor Binding Sites in a Set of Sequences from Co-regulated Genes.  
544 *Nucleic Acids Research*, 32(suppl\_2), W199–W203.  
545 <https://doi.org/10.1093/nar/gkh465>
- 546 Pedregosa, F., Varoquaux, G., Gramfort, A., Michel, V., Thirion, B., Grisel, O., Blondel,  
547 M., Prettenhofer, P., Weiss, R., Dubourg, V., Vanderplas, J., Passos, A.,  
548 Cournapeau, D., Brucher, M., Perrot, M., Duchesnay, E., Louppe, G. (2012). Scikit-  
549 learn: Machine Learning in Python. *Journal of Machine Learning Research*, 12.

- 550 Quang, D., & Xie, X. (2016). DanQ: a Hybrid Convolutional and Recurrent Deep Neural  
551 Network for Quantifying the Function of DNA Dequences. *Nucleic Acids Research*,  
552 44 (11), e107. <https://doi.org/10.1093/nar/gkw226>
- 553 Quinlan, J. R. (1993). Constructing Decision Trees. *C4.5*. [https://doi.org/10.1016/b978-  
554 0-08-050058-4.50007-3](https://doi.org/10.1016/b978-0-08-050058-4.50007-3)
- 555 Robinson, M. D., McCarthy, D. J., & Smyth, G. K. (2010). edgeR: a Bioconductor  
556 Package for Differential Expression Analysis of Digital Gene Expression Data.  
557 *Bioinformatics*, 26. <https://doi.org/10.1093/bioinformatics/btp616>
- 558 Roy, S., Wapinski, I., Pfiffner, J., French, C., Socha, A., Konieczka, J., Habib, N., Kellis,  
559 Thompson, M., & Regev, A. (2013). Arboretum: Reconstruction and Analysis of the  
560 Evolutionary History of Condition-Specific Transcriptional Modules. *Genome  
561 Research*, 23 (6): 1039–50.
- 562 Shi, J., Yang, W., Chen, M., Du, Y., Zhang, J., & Wang, K. (2011). AMD, an Automated  
563 Motif Discovery Tool Using Stepwise Refinement of Gapped Consensuses. *PLoS  
564 One*, 6 (9): e24576.
- 565 Shu, L., Katholi, C.R., Higazi, T., & Unnasch, T.R. (2003). Analysis of the *Brugia Malayi*  
566 HSP70 Promoter Using a Homologous Transient Transfection System. *Molecular  
567 and Biochemical Parasitology*, 128 (1): 67–75.
- 568 Smith, A. D., Sumazin, P., & Zhang, M. Q. (2005). Identifying tissue-selective  
569 transcription factor binding sites in vertebrate promoters. *Proceedings of the  
570 National Academy of Sciences of the United States of America*.  
571 <https://doi.org/10.1073/pnas.0406123102>

- 572 Thijs, G., Marchal, K., Lescot, M., Rombauts, S., Moor, B. D., Rouze, P., & Moreau, Y.  
573 (2002). A Gibbs Sampling Method to Detect Overrepresented Motifs in the  
574 Upstream Regions of Co-expressed Genes. *Journal of Computational Biology*, 9.  
575 <https://doi.org/10.1089/10665270252935566>
- 576 Trapnell, C., Hendrickson, D.G., Sauvageau, M., Goff, L., Rinn, J.L., & Pachter, L.  
577 (2013). Differential Analysis of Gene Regulation at Transcript Resolution with RNA-  
578 Seq. *Nature Biotechnology*, 31 (1): 46–53.
- 579 Trapnell, C., Williams, B.A., Pertea, G., Mortazavi, A., Kwan, G., van Baren, M.J.,  
580 Salzberg, S.L., Wold, B.J., & Pachter, L. (2010). Transcript Assembly and  
581 Quantification by RNA-Seq Reveals Unannotated Transcripts and Isoform  
582 Switching during Cell Differentiation. *Nature Biotechnology*, 28 (5): 511–15.
- 583 Varoquaux, G., Buitinck, L., Louppe, G., Grisel, L., Pedregosa, F., & Mueller, A. (2015).  
584 Scikit-Learn. GetMobile: Mobile Computing and Communications.  
585 <https://doi.org/10.1145/2786984.2786995>.
- 586 Warbrick, E.V., Barker, G.C., Rees, H.H., Howells, R.E. (1993). The Effect of  
587 Invertebrate Hormones and Potential Hormone Inhibitors on the Third Larval Molt  
588 of the Filarial Nematode, *Dirofilaria immitis*, in vitro. *Parasitology*, 107: 459–463.
- 589 Weirauch, M.T., Yang, A., Albu, M., Cote, A.G., Montenegro-Montero, A., Drewe, P.,  
590 Najafabadi, H.S., et al. (2014). Determination and Inference of Eukaryotic  
591 Transcription Factor Sequence Specificity. *Cell*, 158 (6): 1431–43.



- 592 Xu, S., Lui, C., Tzertzinis, G., Ghedin E., Evans, C., Kaplan, R., Unnasch T. (2011). *In*  
593 *Vivo* Transfection of Developmentally Competent *Brugia malayi* Infective Larvae.  
594 *International Journal for Parasitology*, 41(3-4): 355-362.
- 595 Zang X., Maizels R.M. (2001). Serine Proteinase Inhibitors from Nematodes and the  
596 Arms Race between Host and Pathogen. *Trends Biochemical Science*, 26: 191-  
597 197.
- 598
